# Supplementary material
Source: PubMed Central journal article supplement (PMC9583076)
Supplement: NIHMS1835617-supplement-1.pdf [file NIHMS1835617-supplement-1.pdf]

## SUPPLEMENTAL ITEMS

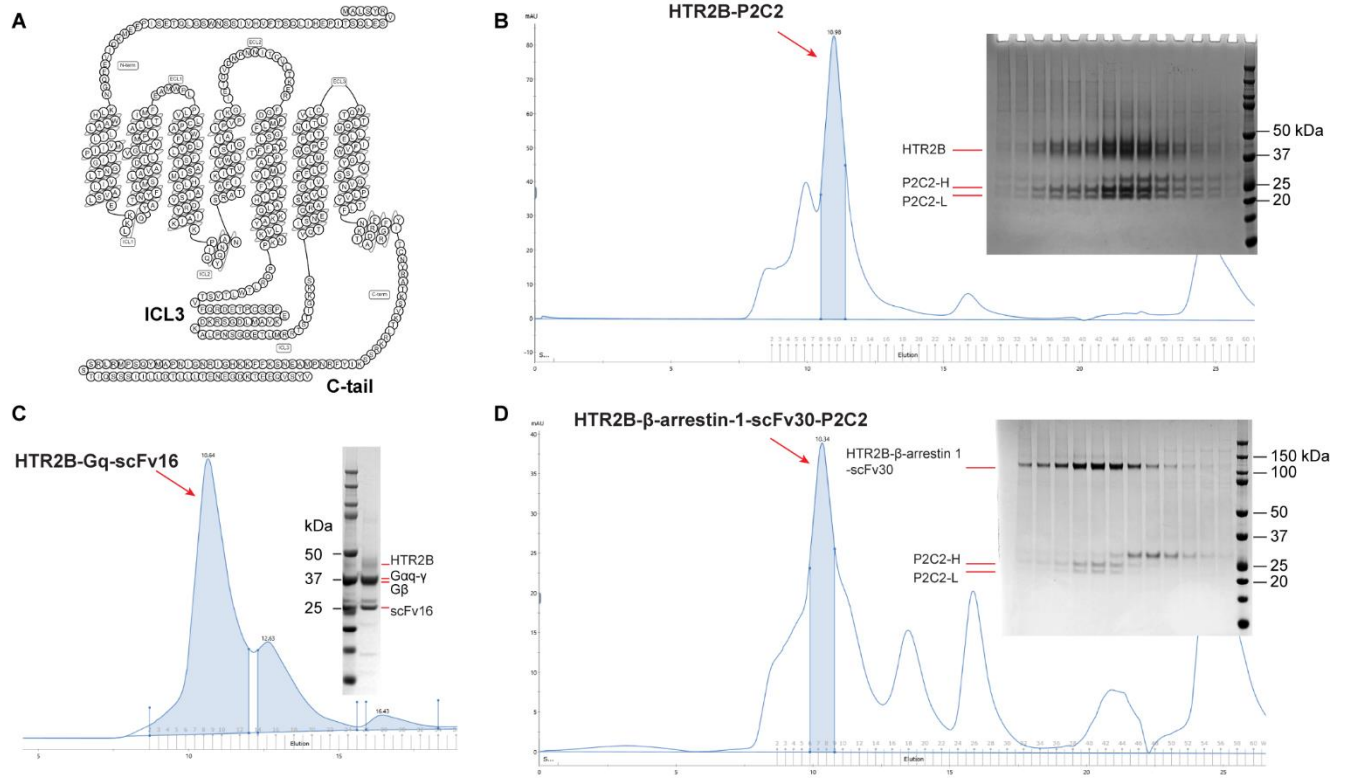

**Figure S1. Purification of HTR2B complexes, related to Figure 1.** (A) Snake plot of HTR2B (from GPCRDB), showing the long ICL3 and C-tail. (B) Size exclusion chromatography and Nu-PAGE gel of transducer-free HTR2B in complex with Fab P2C2. (C) Size exclusion chromatography and Nu-PAGE gel of HTR2B-Gq-scFv16 complex. (D) Size exclusion chromatography and Nu-PAGE gel of HTR2B- $\beta$ -arrestin-1-scFv30 in complex with Fab P2C2.

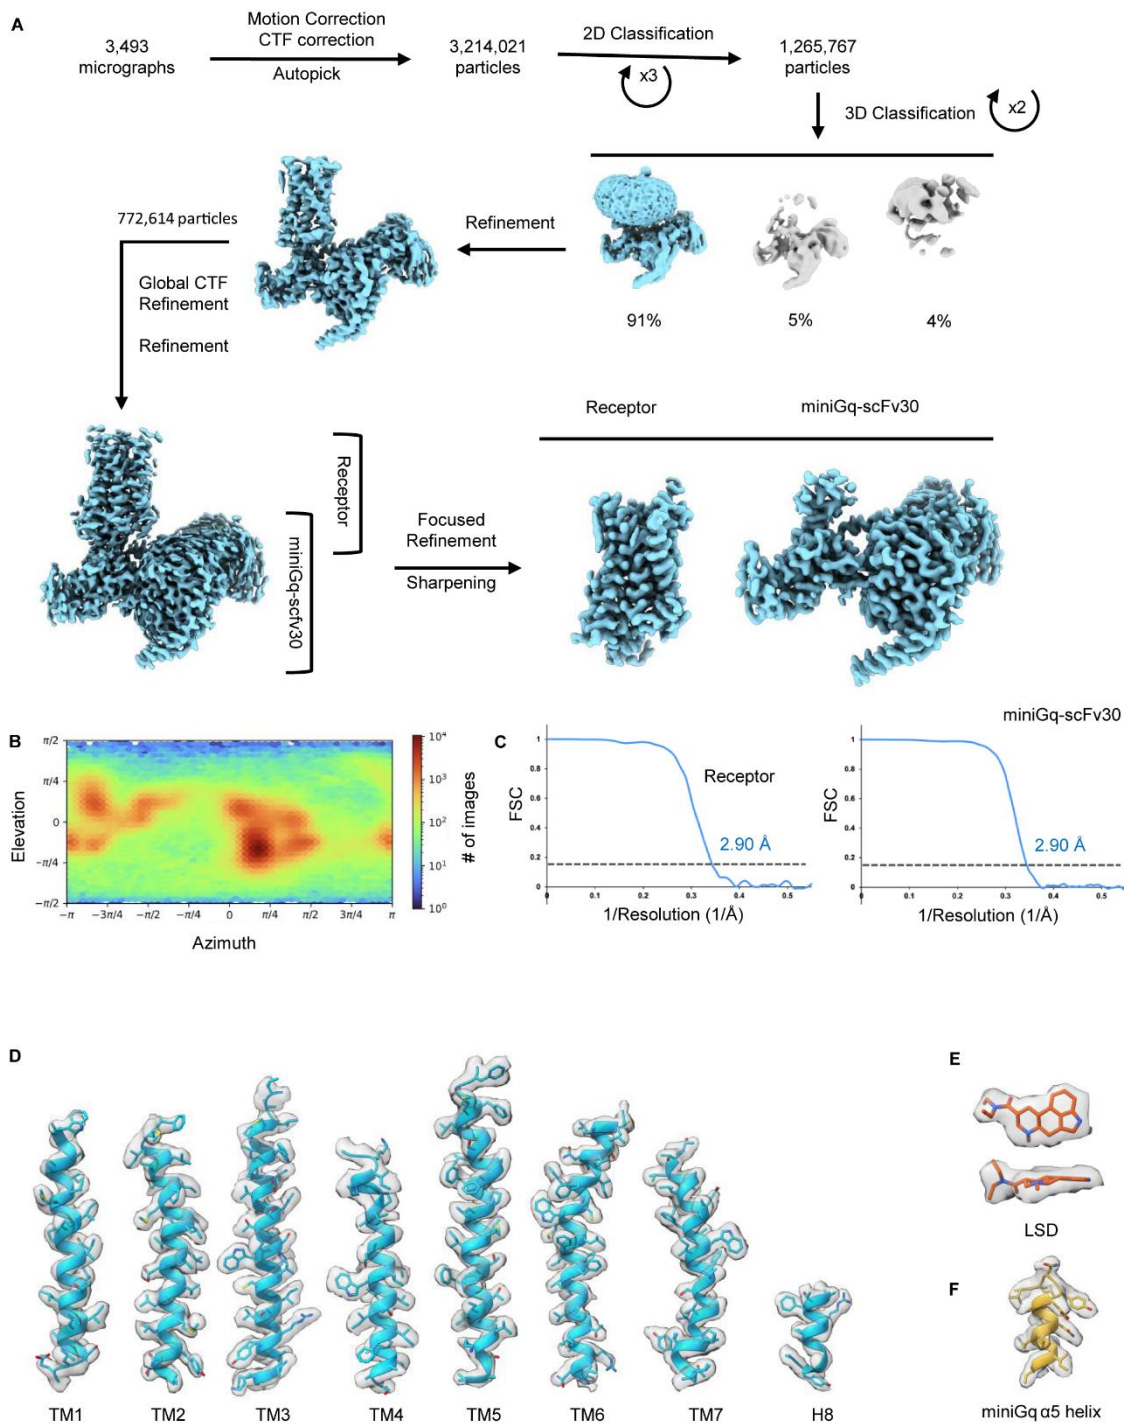

**Figure S2. cryoEM Data processing of transducer-free HTR2B in complex with LSD, related to Figure 1 and Figure 2.** (A) Workflow of cryo-EM data processing for HTR2B bound to LSD. (B) Angular distribution heat map of HTR2B-LSD/2B-Fab particles for the reconstruction. (C) Gold standard Fourier shell correlation (FSC) curve for the local

receptor-LSD reconstruction. Dashed line represents the overall nominal resolution at 0.143 FSC calculated by CryoSPARC. (D) Cryo-EM density for TM1-7 and helix 8 of HTR2B. (E) CryoEM density of LSD.

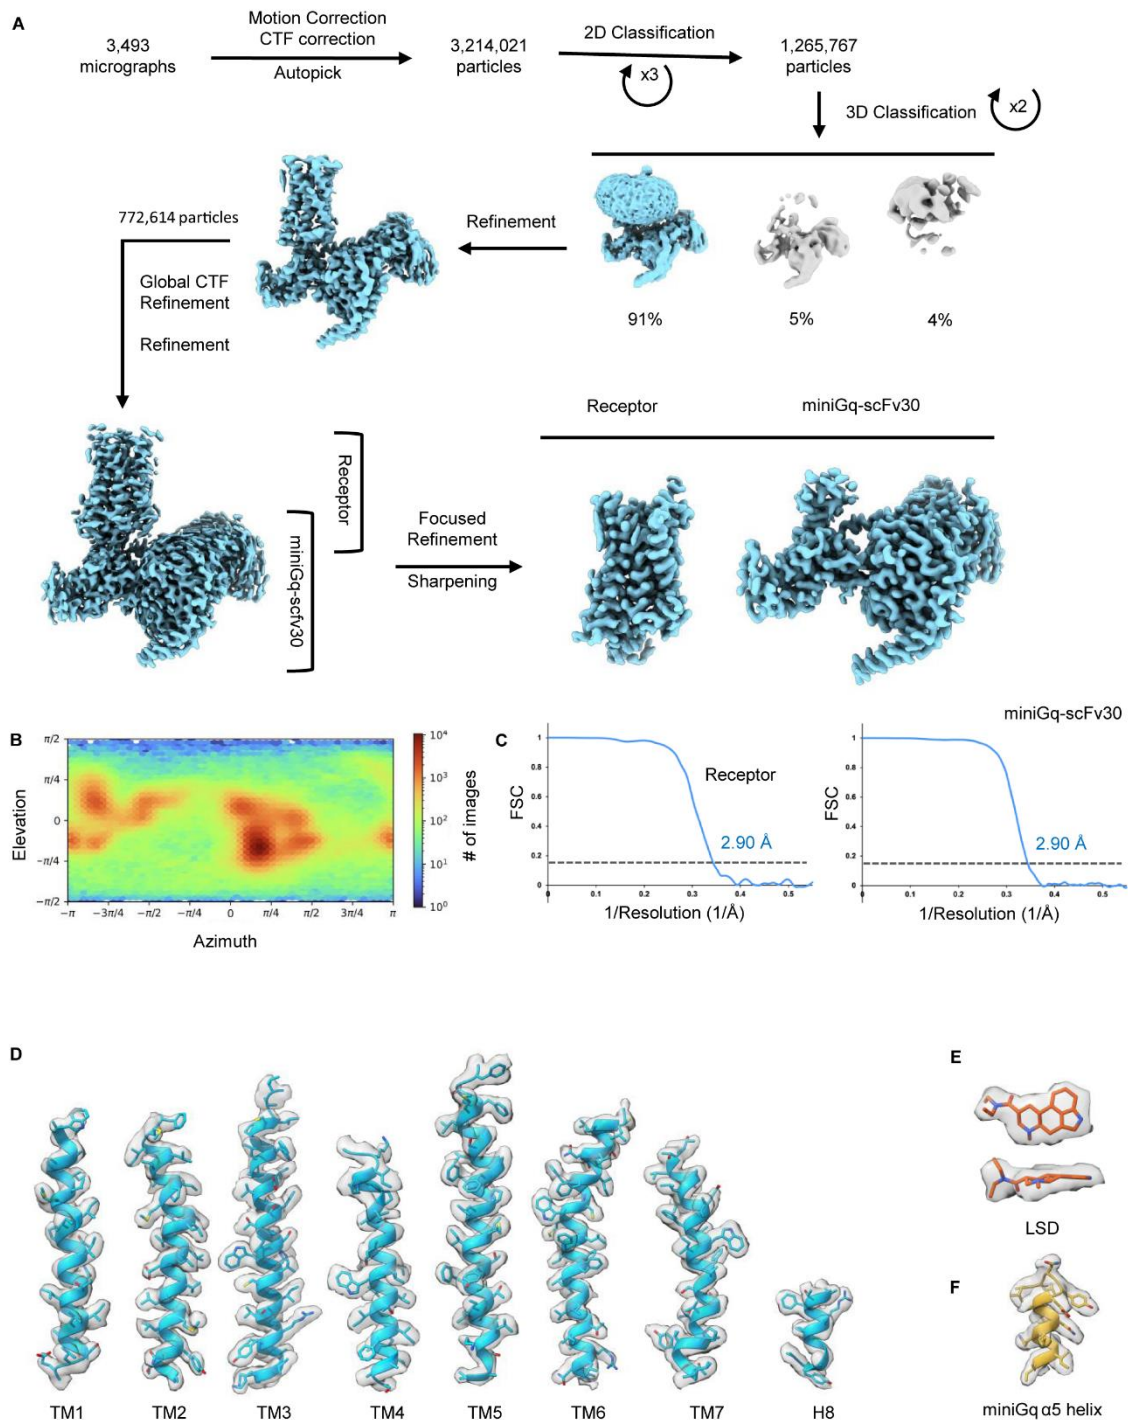

**Figure S3. cryoEM Data processing of Gq-coupled HTR2B in complex with LSD, related to Figure 1 and Figure 3.** (A) Workflow of cryo-EM data processing for the HTR2B/miniGq complex bound to LSD. (B) Angular distribution heat map of particles for HTR2B-LSD/miniGq reconstruction. (C) Gold standard Fourier shell correlation (FSC)

curve for receptor-LSD and miniGq/scfv local reconstructions. Dashed line represents the overall nominal resolution of each reconstruction at 0.143 FSC calculated by CryoSPARC. (D) Cryo-EM density for TM1-7 and helix 8 of HTR2B. (E-F) CryoEM density for LSD (E) and  $\alpha 5$  helix of miniGq (F).

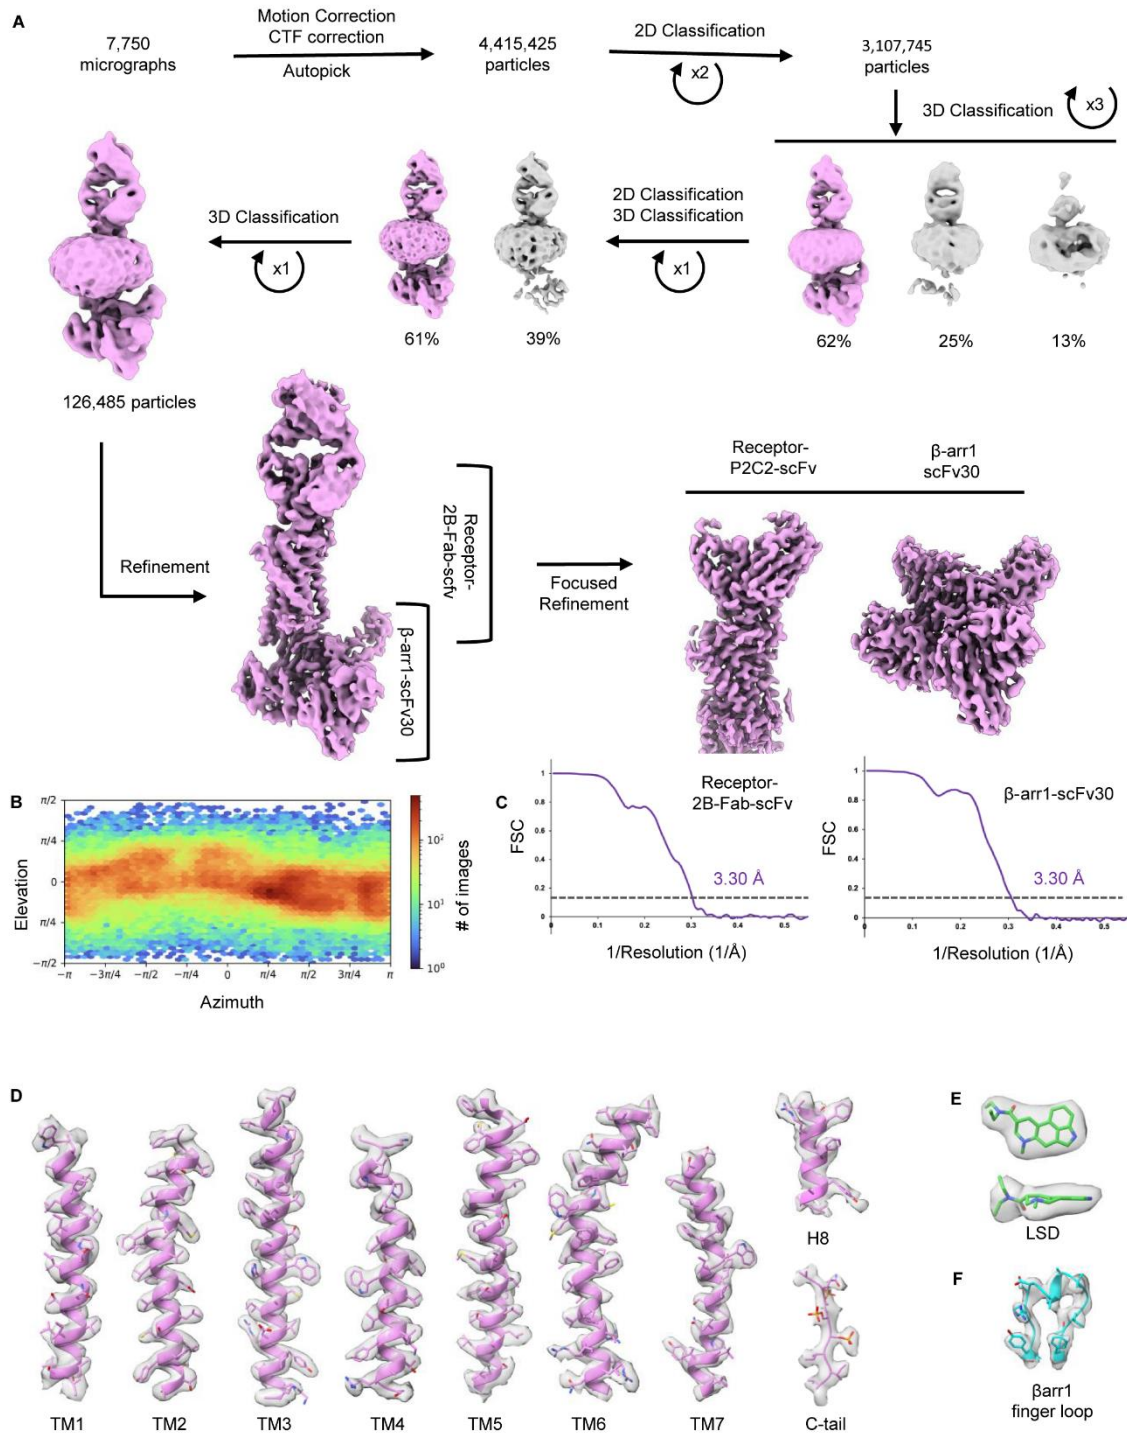

**Figure S4. cryoEM Data processing of  $\beta$ -arrestin-1-coupled HTR2B in complex with LSD, related to Figure 1 and Figure 4. (A) Workflow of cryo-EM data processing for the HTR2B/ $\beta$ -arrestin-1 complex bound to LSD. (B) Angular distribution heat map of particles for HTR2B-LSD/  $\beta$ -arrestin-1 reconstruction. (C) Gold standard Fourier shell correlation**

(FSC) curve for receptor-LSD/P2C2-scFv and  $\beta$ -arrestin-1/scFv30 local reconstructions. Dashed line represents the overall nominal resolution of each reconstruction at 0.143 FSC calculated by CryoSPARC. (D) Cryo-EM density for TM1-7, helix 8 and C-terminal tail of HTR2B. (E-F) CryoEM density for LSD (E) and  $\beta$ -arrestin-1 finger loop (F).

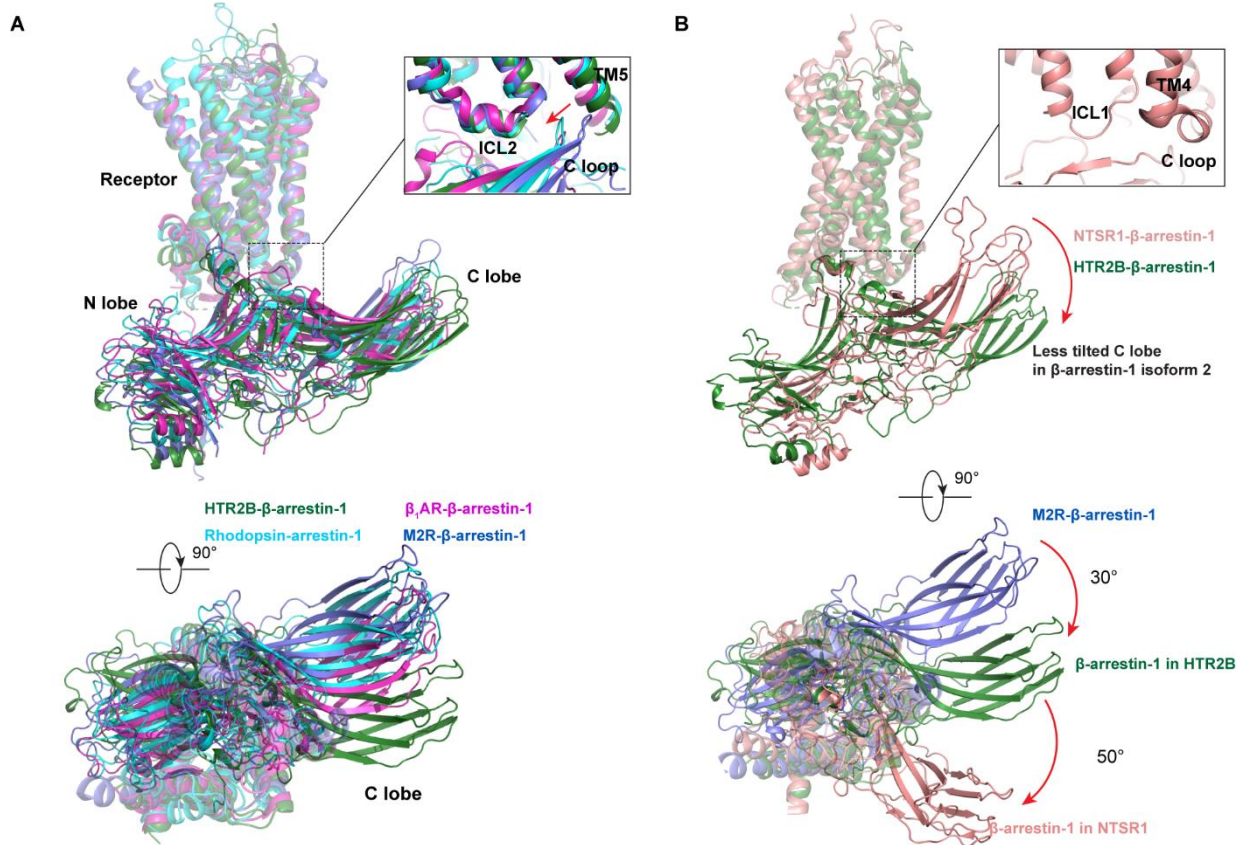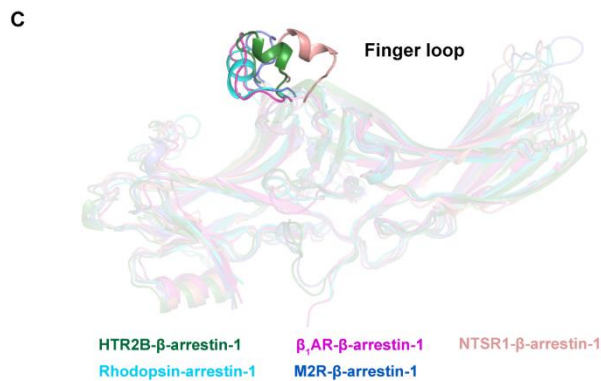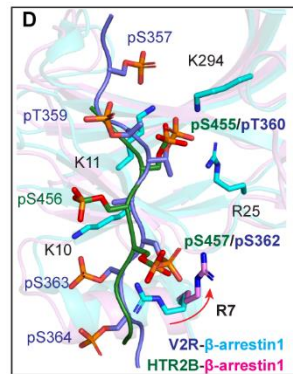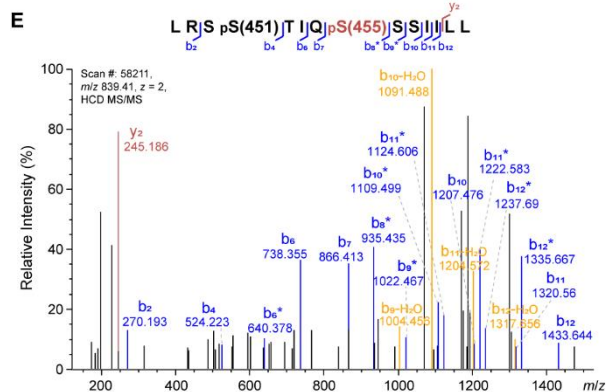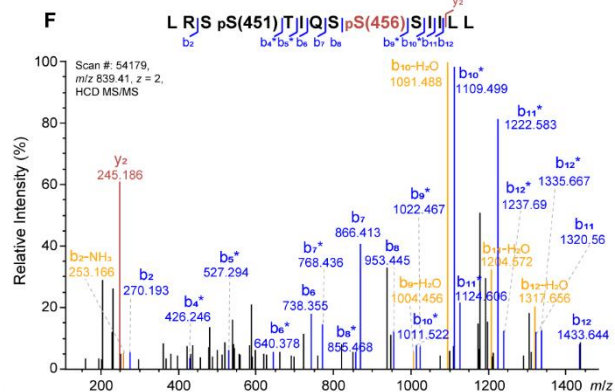



**Figure S5. Structural comparison of GPCR-arrestin complexes, related to Figure 4.**

(A) Overlay of HTR2B- $\beta$ -arrestin-1 structure with structures of Rhodopsin-arrestin 1 (PDB: 5W0P),  $\beta_1$ AR- $\beta$ -arrestin-1 (PDB: 6TKO) and M2R- $\beta$ -arrestin-1 (PDB: 6U1N), showing a similar arrestin binding mode in these receptors. The inset shows an enlarged view of the interactions between the ICL2 of receptor and arrestins. The relative movement of  $\beta$ -arrestin-1 C loop pushed by the TM5 of HTR2B is indicated by red arrow. (B) Overlay of HTR2B- $\beta$ -arrestin-1 structure with NTSR1- $\beta$ -arrestin-1 structure to show a different arrestin binding mode in these two receptors. Although both structures are obtained in detergent micelle,  $\beta$ -arrestin-1 isoform 2 used in HTR2B has a less tilted angle. The inset shows an enlarged view of the interactions between ICL1, instead of ICL2, of NTSR1 and  $\beta$ -arrestin-1. M2R- $\beta$ -arrestin-1 structure is added in the top view of alignment to highlight the unique coupling mode of  $\beta$ -arrestin-1 in HTR2B. (C) Structural alignment of arrestins shows various conformations of finger loop upon coupling to different GPCRs. (D) Structural comparison of HTR2B C-tail with V2R tail (PDB: 4JQI), highlighting the difference of C-tail phosphorylation patterns. (E-F) MS spectra of HTR2B- $\beta$ -arrestin-1-scFv30 fusion protein indicated that residues S455 (E) and S456 (F) were phosphorylated. See Table S5 for phosphorylation probabilities.

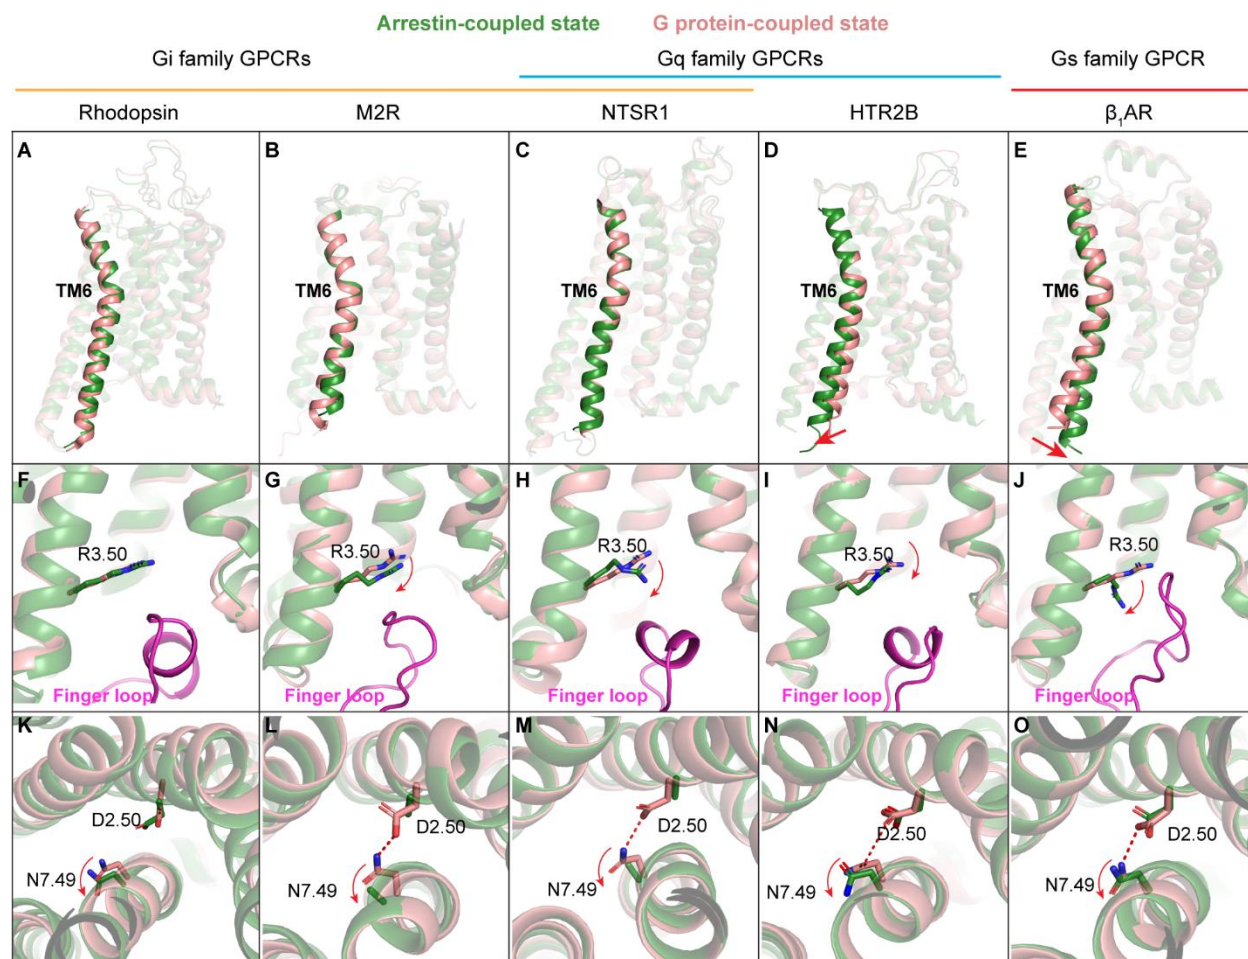

**Figure S6. Structural comparison of the receptor portion of GPCR-arrestin complexes with their G protein-coupled structures, related to Figure 5 and Figure 6.** (A-E) Overlay of G protein-coupled Rhodopsin (A), M2R (B), NTSR1 (C), HTR2B (D) and  $\beta_1$ AR (E) with their arrestin-coupled states, highlighting the conformational difference of TM6 upon coupling to different transducers. The relative movement of TM6 from G protein-coupled state to arrestin-coupled state is indicated by red arrow. Structures of Gi1-coupled Rhodopsin (PDB: 6CMO), arrestin 1-coupled Rhodopsin (PDB: 5W0P), GoA-coupled M2R (PDB: 6OIK),  $\beta$ -arrestin-1-coupled M2R (PDB: 6U1N), Gi1-coupled NTSR1 (PDB: 6OS9),  $\beta$ -arrestin-1-coupled NTSR1 (PDB: 6UP7), Gq-coupled HTR2B,  $\beta$ -arrestin-1-coupled HTR2B, Gs-coupled  $\beta_1$ AR (PDB: 7JJO) and  $\beta$ -arrestin-1-coupled  $\beta_1$ AR (PDB: 6TKO) were used. (F-J) Conformational difference of R<sup>3.50</sup> in G protein- and arrestin-coupled structures of Rhodopsin (F), M2R (G), NTSR1 (H), HTR2B (I) and  $\beta_1$ AR (J). A

downward shift of the side chain of R3.50 is observed in most receptors to accommodate the various conformation of arrestin finger loop. In contrast, R<sup>3.50</sup> adopts an extended conformation to engage G protein in all the receptors. (K-O) Residue N<sup>7.49</sup> has a counter-clockwise rotation away from D<sup>2.50</sup> in arrestin-coupled structures of Rhodopsin (K), M2R (L), NTSR1 (M), HTR2B (N) and  $\beta_1$ AR (O).

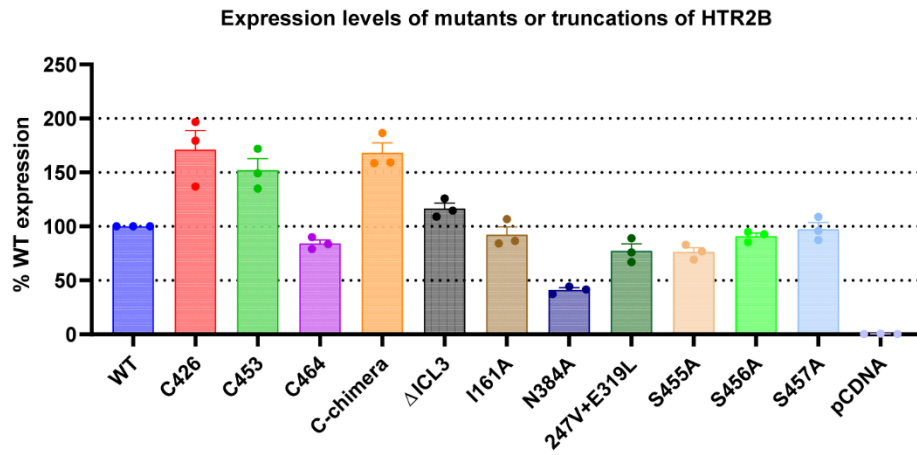

**Figure S7.** The expression level of HTR2B mutants relative to the WT measured by the Rluc8 counts, related to Figure 1, Figure 4 and Figure 5. Data represent mean  $\pm$  SEM of  $n = 3$  biological replicates.

**Table S1. Cryo-EM data collection, model refinement and validation statistics.  
Related to Figure 1**

| Structure<br>PDB ID                                 | HTR2B/LSD<br>7SRQ | HTR2B-miniGq-LSD<br>7SRR          | HTR2B/ $\beta$ -arrestin-1<br>7SRS          |
|-----------------------------------------------------|-------------------|-----------------------------------|---------------------------------------------|
| <b>Data collection and processing</b>               |                   |                                   |                                             |
| Magnification                                       | 55,000            | 55,000                            | 57,050                                      |
| Voltage (kV)                                        | 300               | 300                               | 300                                         |
| Dose per frame (e <sup>-</sup> /Å <sup>2</sup> )    | 1.23              | 1.07                              | 1.36                                        |
| Electron exposure (e <sup>-</sup> /Å <sup>2</sup> ) | 61.5              | 61.0                              | 68.0                                        |
| Defocus Range (μm)                                  | -0.7 to -1.8      | -0.8 to -1.8                      | -0.8 to -1.8                                |
| Pixel size (Å)                                      | 0.8677            | 0.8677                            | 0.8521                                      |
| Symmetry imposed                                    | C1                | C1                                | C1                                          |
| Number of Micrographs                               | 12,303            | 3,493                             | 7,750                                       |
| Initial particle images (no.)                       | 8,491,352         | 3,214,021                         | 4,415,425                                   |
| Final particle images (no.)                         | 665,475           | 772,614                           | 126,485                                     |
| Map resolution (Å) #                                | Receptor (2.7)    | Receptor (2.9)<br>G protein (2.9) | Receptor (3.3)<br>$\beta$ -arrestin-1 (3.3) |
| FSC threshold                                       | 0.143             | 0.143                             | 0.143                                       |
| <b>Refinement Statistics*</b>                       |                   |                                   |                                             |
| Model composition                                   |                   |                                   |                                             |
| Number of chains                                    | 1                 | 5                                 | 6                                           |
| Number of residues                                  | 254               | 1119                              | 1103                                        |
| Total number of atoms                               | 1960              | 8394                              | 8357                                        |
| Protein                                             | 1922              | 8370                              | 8319                                        |
| Ligand                                              | 24                | 24                                | 24                                          |
| R.m.s. deviations                                   |                   |                                   |                                             |
| Bond lengths (Å)                                    | 0.014             | 0.007                             | 0.008                                       |

|                      |       |       |       |
|----------------------|-------|-------|-------|
| Bond angles (°)      | 0.912 | 0.706 | 1.003 |
| Ramachandran plot    |       |       |       |
| Favored (%)          | 97    | 97    | 97    |
| Outlier (%)          | 0     | 0     | 0     |
| Rotamer outliers (%) | 1.5   | 0.12  | 0.23  |
| Clash score          | 8.67  | 3.89  | 3.82  |
| Molprobity score     | 1.75  | 1.39  | 1.39  |

#Reported by cryoSPARC and \*Phenix comprehensive cryo-EM validation

**Table S2. BRET1  $\beta$ -arrestin-1 recruitment assay for C-tail truncation of HTR2B. Related to Figure 1.** Emax is defined as percent WT maximum response. Data represent mean  $\pm$  SEM of n = 6 biological replicates.

| HTR2B construct | 5-HT                        |                       |                       |
|-----------------|-----------------------------|-----------------------|-----------------------|
|                 | pEC <sub>50</sub> $\pm$ SEM | EC <sub>50</sub> (nM) | Emax $\pm$ SEM (% WT) |
| WT              | 8.65 $\pm$ 0.03             | 2.22                  | 100.0 $\pm$ 1.2       |
| C426            | 8.97 $\pm$ 0.11             | 1.07                  | 22.7 $\pm$ 0.8        |
| C453            | 8.61 $\pm$ 0.08             | 2.41                  | 26.4 $\pm$ 0.7        |
| C464            | 8.55 $\pm$ 0.03             | 2.79                  | 154.8 $\pm$ 1.9       |
| C-Chimera       | 8.87 $\pm$ 0.05             | 1.35                  | 242.9 $\pm$ 5.1       |
| $\Delta$ ICL3   | 8.75 $\pm$ 0.04             | 1.78                  | 182.7 $\pm$ 2.7       |

**Table S3. BRET1  $\beta$ -arrestin-1 recruitment assay for ionic lock mutations of HTR2B. Related to Figure 1.** Emax is defined as percent WT maximum response of each agonist. Data represent mean  $\pm$  SEM of n = 4 biological replicates.

| HTR2B construct | Agonist | pEC <sub>50</sub> $\pm$ SEM | EC <sub>50</sub> (nM) | Basal (% WT Emax) | Emax $\pm$ SEM (% WT) |
|-----------------|---------|-----------------------------|-----------------------|-------------------|-----------------------|
| WT              | 5-HT    | 8.46 $\pm$ 0.02             | 3.43                  | 0.0 $\pm$ 0.7     | 100.0 $\pm$ 0.8       |
| K247V+E319L     |         | 9.21 $\pm$ 0.25             | 0.61                  | 67.5 $\pm$ 2.9    | 98.5 $\pm$ 2.4        |
| WT              | LSD     | 8.65 $\pm$ 0.13             | 2.25                  | 2.1 $\pm$ 1.1     | 27.6 $\pm$ 1.2        |
| K247V+E319L     |         | 8.96 $\pm$ 0.39             | 1.07                  | 71.1 $\pm$ 3.0    | 92.6 $\pm$ 2.8        |



**Table S4. BRET1  $\beta$ -arrestin-1 recruitment assay for  $\beta$ -arrestin-1 and HTR2B interface mutations. Related to Figure 4.** Emax is defined as percent WT maximum response. Data represent mean  $\pm$  SEM of n = 3 biological replicates.

| Protein             | 5-HT      |                             |                       |                       |
|---------------------|-----------|-----------------------------|-----------------------|-----------------------|
|                     | Mutations | pEC <sub>50</sub> $\pm$ SEM | EC <sub>50</sub> (nM) | Emax $\pm$ SEM (% WT) |
| $\beta$ -arrestin-1 | WT        | 8.72 $\pm$ 0.05             | 1.88                  | 100.0 $\pm$ 1.6       |
|                     | R65A      | 8.68 $\pm$ 0.14             | 2.07                  | 21.5 $\pm$ 1.1        |
|                     | L71A      | 8.37 $\pm$ 0.19             | 4.30                  | 26.9 $\pm$ 1.8        |
|                     | L73A      | 8.49 $\pm$ 0.10             | 3.23                  | 60.3 $\pm$ 2.2        |
| HTR2B               | WT        | 8.53 $\pm$ 0.03             | 2.89                  | 100.0 $\pm$ 1.2       |
|                     | I161A     | 8.20 $\pm$ 0.14             | 6.35                  | 30.8 $\pm$ 1.7        |
|                     | S455A     | 8.50 $\pm$ 0.08             | 3.10                  | 58.2 $\pm$ 1.6        |
|                     | S456A     | 8.55 $\pm$ 0.06             | 2.78                  | 72.2 $\pm$ 1.6        |
|                     | S457A     | 8.58 $\pm$ 0.07             | 2.59                  | 51.9 $\pm$ 1.4        |

**Table S5. Mass spectrometry analysis of GRK2 phosphorylated HTR2B- $\beta$ -arrestin-1-scFv30 samples expressed in sf9 cells. Related to Figure 4.** The of HTR2B C-tail residues S455, S456 and S457 in selected peptide fragments that have a phosphorylation probability (shown in the brackets) over 0.75 are highlighted in red.

| Position  | Phospho (STY) Probabilities                                    | Charge | m/z        |
|-----------|----------------------------------------------------------------|--------|------------|
| S450      | LRS450(0.333)S(0.333)T(0.333)IQSSSIILL                         | 2      | 799.43167  |
| S450      | S450(0.333)S(0.333)T(0.333)IQSSSIILL                           | 2      | 664.839083 |
| S450/S451 | LRS450(0.414)S451(0.472)T(0.487)IQS(0.246)S(0.207)S(0.173)IILL | 2      | 839.414836 |
| S450/S455 | LRS450(0.571)S(0.418)T(0.011)IQS455(0.575)S(0.422)S(0.004)IILL | 2      | 839.414836 |
| S451/S455 | LRS(0.372)S451(0.495)T(0.186)IQS455(0.807)S(0.137)S(0.003)IILL | 2      | 839.414836 |
| S451/S455 | LRS(0.383)S451(0.501)T(0.152)IQS455(0.765)S(0.112)S(0.087)IILL | 2      | 839.414836 |
| S451/S455 | LRS(0.408)S451(0.52)T(0.363)IQS455(0.58)S(0.107)S(0.022)IILL   | 2      | 839.414836 |
| S451/S456 | LRS(0.326)S451(0.478)T(0.196)IQS(0.049)S456(0.925)S(0.026)IILL | 2      | 839.414836 |
| T452/S455 | LRS(0.239)S(0.328)T452(0.45)IQS455(0.774)S(0.121)S(0.088)IILL  | 2      | 839.414836 |
| T452/S455 | LRS(0.265)S(0.308)T452(0.475)IQS455(0.729)S(0.12)S(0.103)IILL  | 2      | 839.414836 |
| T452/S455 | LRS(0.305)S(0.354)T452(0.406)IQS455(0.713)S(0.119)S(0.103)IILL | 2      | 839.414836 |
| T452/S455 | LRS(0.316)S(0.378)T452(0.437)IQS455(0.695)S(0.096)S(0.079)IILL | 2      | 839.414836 |
| T452/S455 | LRS(0.376)S(0.442)T452(0.474)IQS455(0.528)S(0.099)S(0.082)IILL | 2      | 839.414836 |
| S456      | SST(0.001)IQS(0.066)S456(0.867)S(0.066)IILL                    | 2      | 664.839083 |
| S456      | SSTIQS(0.035)S456(0.617)S(0.348)IILL                           | 2      | 664.839083 |
| S457      | LRS(0.26)S(0.327)T452(0.413)IQS(0.054)S(0.418)S457(0.528)IILL  | 2      | 839.414836 |

**Table S6. BRET1  $\beta$ -arrestin-1 or miniGq recruitment assay for WT and N384A mutant of HTR2B. Related to Figure 5.** Emax is defined as percent transducer maximum response of each agonist. Data represent mean  $\pm$  SEM of n = 3 biological replicates.

| HTR2B construct | Agonist | Transducer          | pEC <sub>50</sub> $\pm$ SEM | EC <sub>50</sub> (nM) | Emax $\pm$ SEM (% WT) |
|-----------------|---------|---------------------|-----------------------------|-----------------------|-----------------------|
| WT              | 5-HT    | $\beta$ -arrestin-1 | 8.31 $\pm$ 0.05             | 4.79                  | 99.8 $\pm$ 1.9        |
|                 |         | miniGq              | 8.94 $\pm$ 0.04             | 1.15                  | 100.2 $\pm$ 1.3       |
|                 | LSD     | $\beta$ -arrestin-1 | 8.92 $\pm$ 0.08             | 1.20                  | 95.2 $\pm$ 2.6        |
|                 |         | miniGq              | 9.01 $\pm$ 0.05             | 0.97                  | 99.3 $\pm$ 1.4        |
| N384A           | LSD     | $\beta$ -arrestin-1 | 8.46 $\pm$ 0.02             | 2.04                  | 192.9 $\pm$ 4.8       |
|                 |         | miniGq              | 8.84 $\pm$ 0.07             | 1.45                  | 64.6 $\pm$ 1.5        |
